# Supplementary material for: Thermal Rearrangement of Thiocarbonyl-Stabilised Triphenylphosphonium Ylides Leading to (Z)-1-Diphenylphosphino-2-(phenylsulfenyl)alkenes and Their Coordination Chemistry
Source: MDPI journal article supplement (doi:10.3390/molecules29010221), 2023-12-31

## Supplementary Material

### Contents

Figure S1: 300 MHz  $^1\text{H}$  NMR spectrum of **10** ( $\text{CDCl}_3$ )

Figure S2: 121 MHz  $^{31}\text{P}$  NMR spectrum of **10** ( $\text{CDCl}_3$ )

Figure S3: 75 MHz  $^{13}\text{C}$  NMR spectrum of **10** ( $\text{CDCl}_3$ )

Figure S4: 300 MHz  $^1\text{H}$  NMR spectrum of **11** ( $\text{CDCl}_3$ )

Figure S5: 121 MHz  $^{31}\text{P}$  NMR spectrum of **11** ( $\text{CDCl}_3$ )

Figure S6: 75 MHz  $^{13}\text{C}$  NMR spectrum of **11** ( $\text{CDCl}_3$ )

Figure S7: 300 MHz  $^1\text{H}$  NMR spectrum of **12** ( $\text{CDCl}_3$ )

Figure S8: 121 MHz  $^{31}\text{P}$  NMR spectrum of **12** ( $\text{CDCl}_3$ )

Figure S9: 75 MHz  $^{13}\text{C}$  NMR spectrum of **12** ( $\text{CDCl}_3$ )

Figure S10: 300 MHz  $^1\text{H}$  NMR spectrum of **13** (*Z/E* 6.5:1) ( $\text{CDCl}_3$ )

Figure S11: 121 MHz  $^{31}\text{P}$  NMR spectrum of **13** (*Z/E* 6.5:1) ( $\text{CDCl}_3$ )

Figure S12: 75 MHz  $^{13}\text{C}$  NMR spectrum of **13** (*Z/E* 6.5:1) ( $\text{CDCl}_3$ )

Figure S13: 300 MHz  $^1\text{H}$  NMR spectrum of **13** (*Z/E* 1:1) ( $\text{CDCl}_3$ )

Figure S14: 300 MHz  $^1\text{H}$  NMR spectrum of **13** (*Z/E* 1:1) ( $\text{CDCl}_3$ ) Expansions

Figure S15: 121 MHz  $^{31}\text{P}$  NMR spectrum of **13** (*Z/E* 1:1) ( $\text{CDCl}_3$ )

Figure S16: 75 MHz  $^{13}\text{C}$  NMR spectrum of **13** (*Z/E* 1:1) ( $\text{CDCl}_3$ )

Figure S1: 300 MHz  $^1\text{H}$  NMR spectrum of **10** ( $\text{CDCl}_3$ )

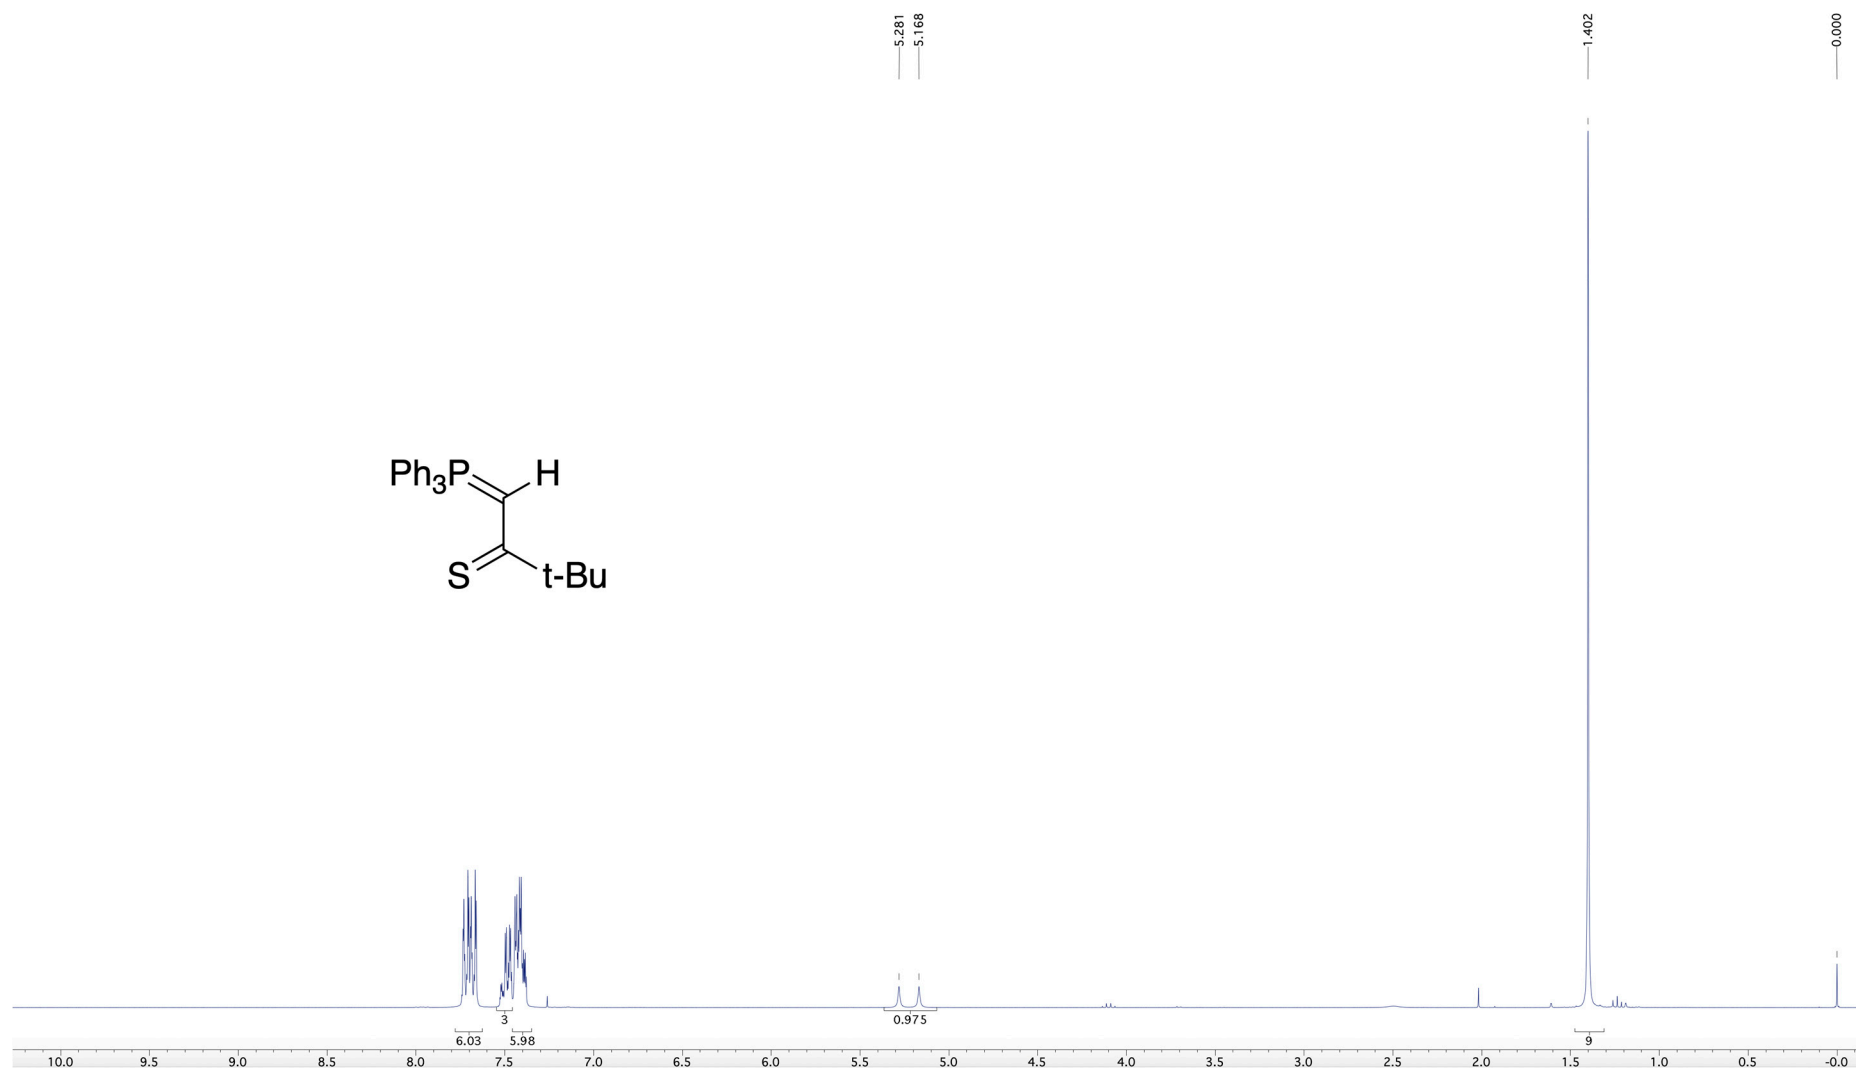

Figure S2: 121 MHz  $^{31}\text{P}$  NMR spectrum of **10** ( $\text{CDCl}_3$ )

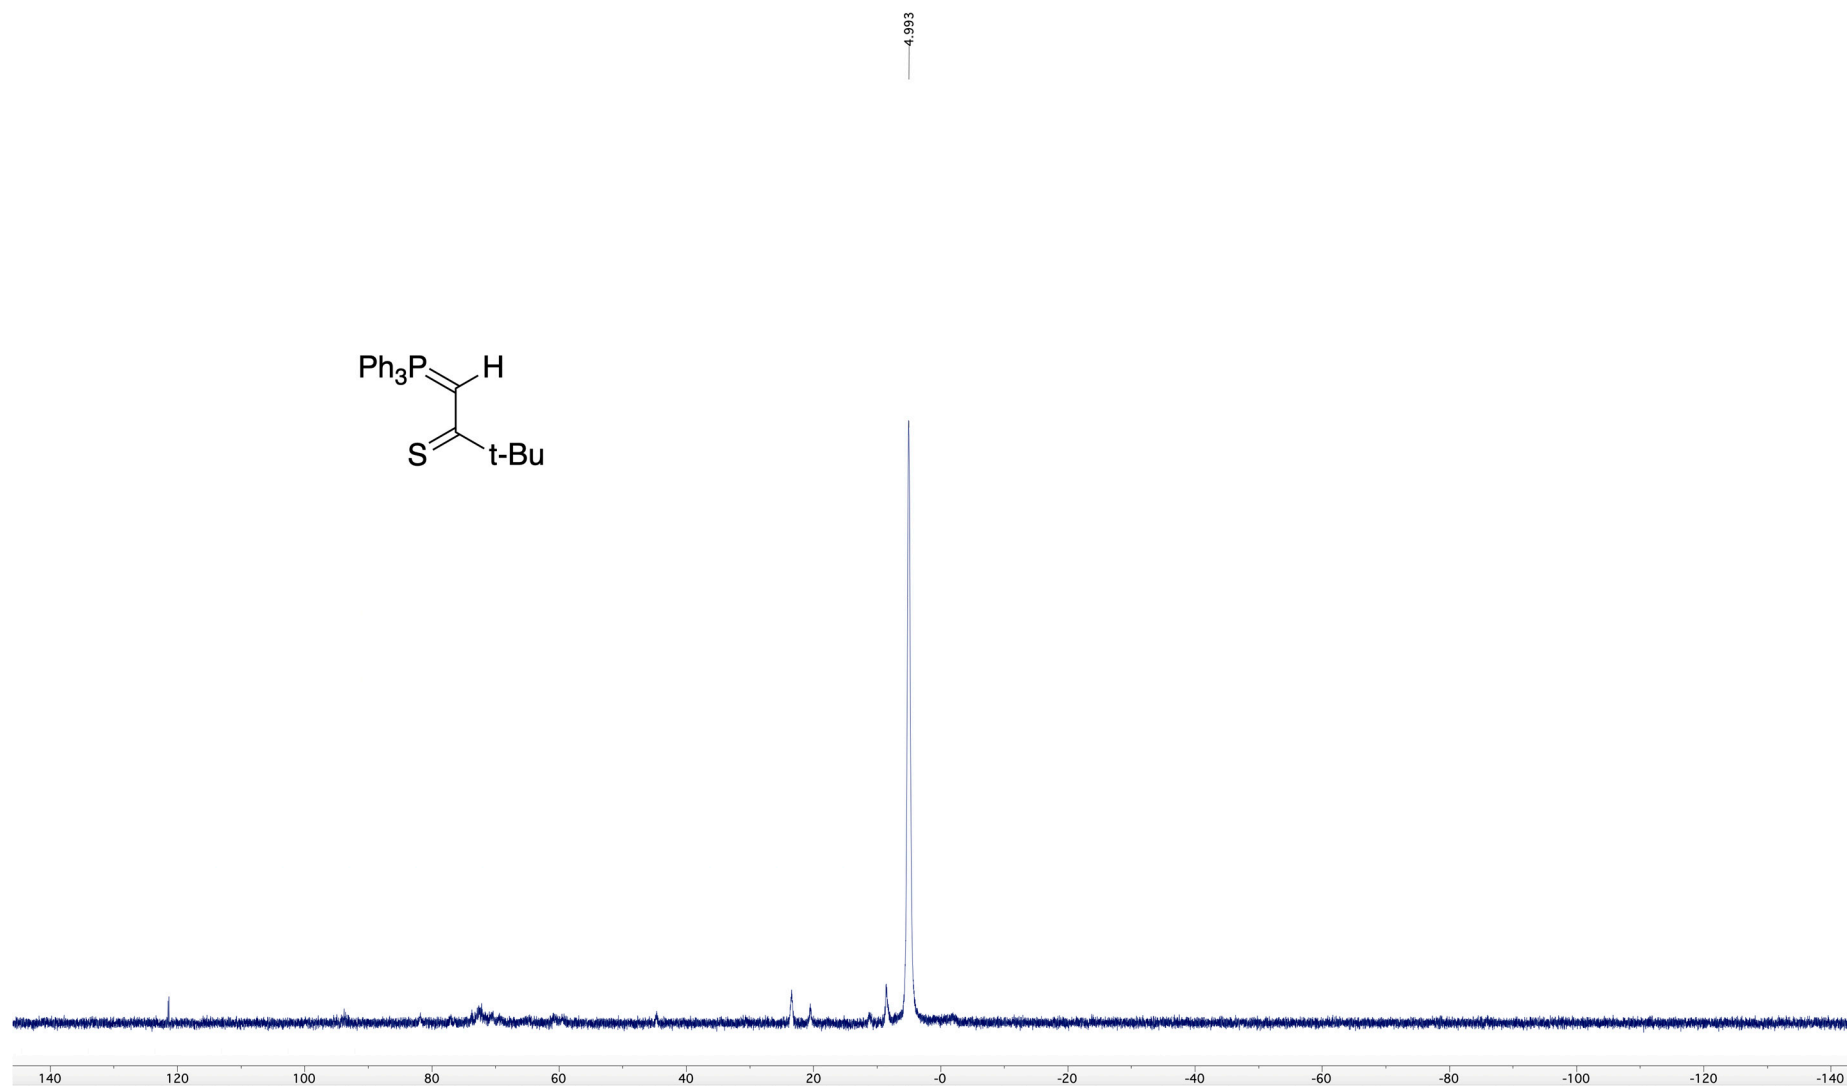

Figure S3: 75 MHz DEPTQ  $^{13}\text{C}$  NMR spectrum of **10** ( $\text{CDCl}_3$ )

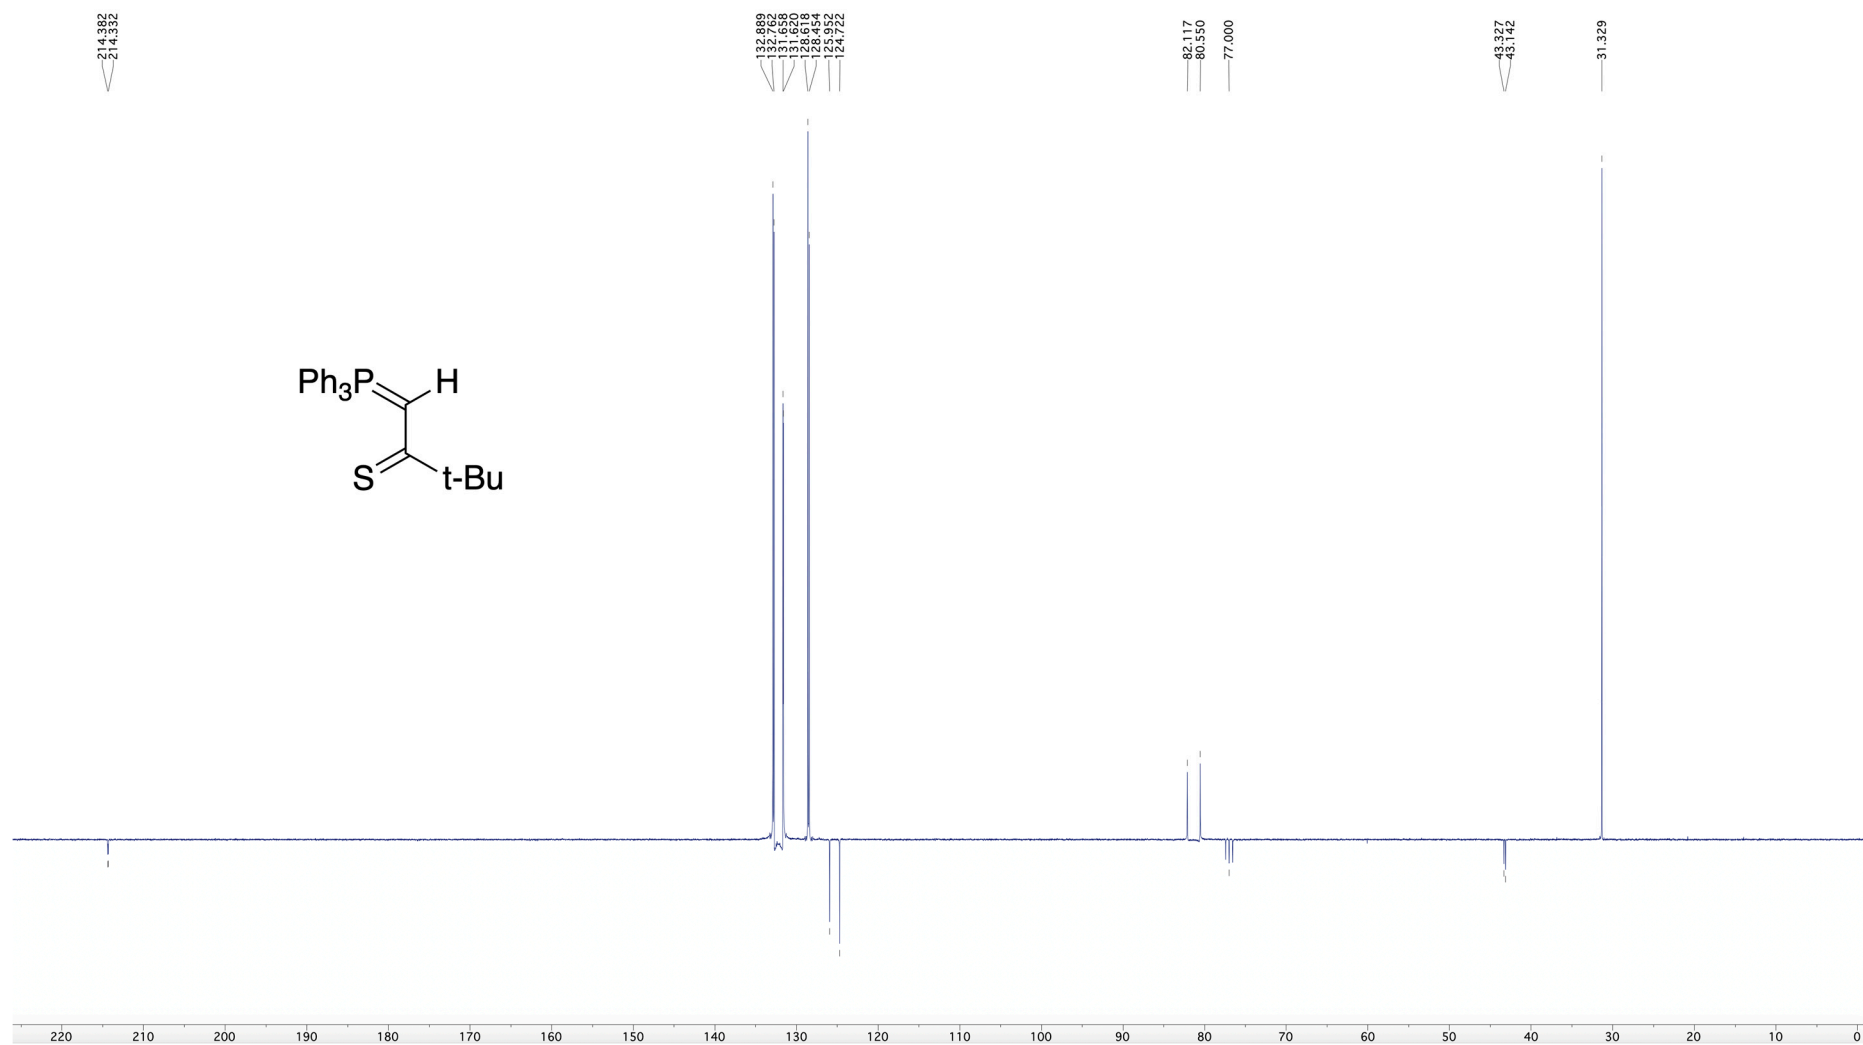

Figure S4: 300 MHz  $^1\text{H}$  NMR spectrum of **11** ( $\text{CDCl}_3$ )

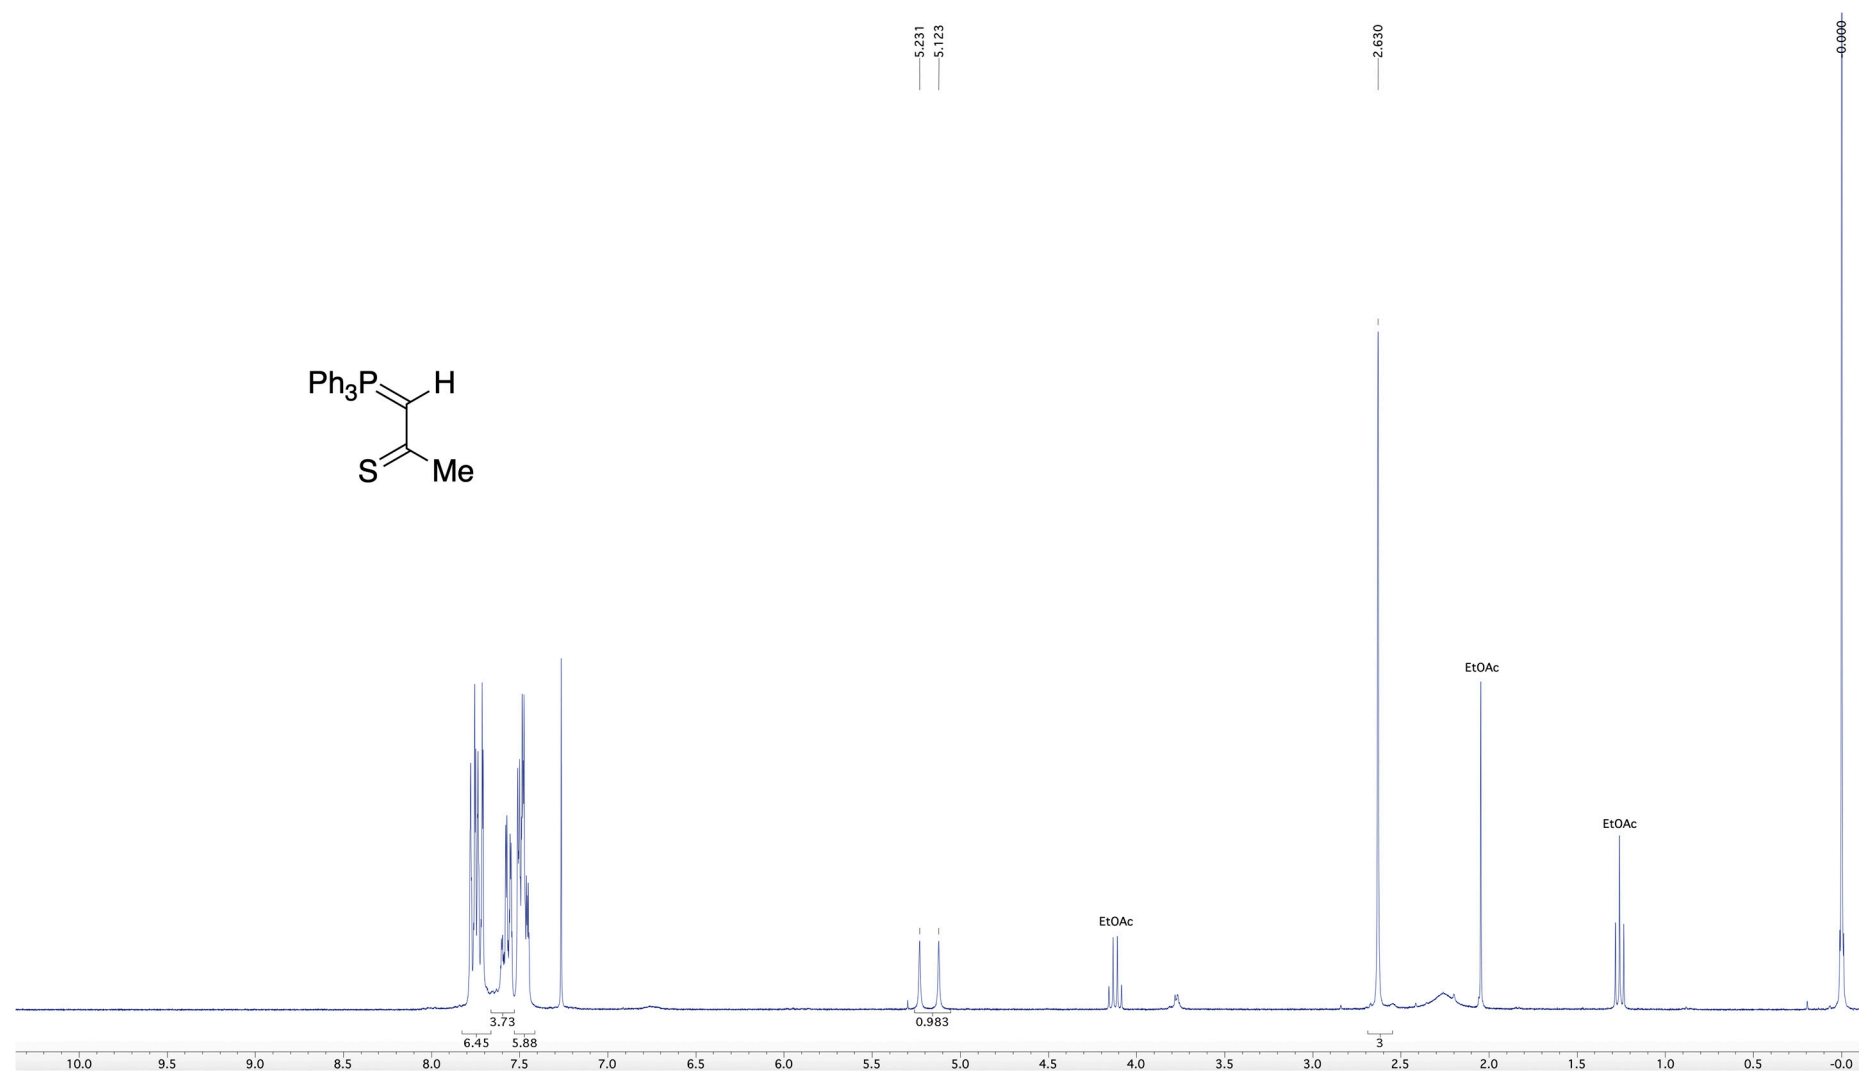

Figure S5: 121 MHz  $^{31}\text{P}$  NMR spectrum of **11** ( $\text{CDCl}_3$ )

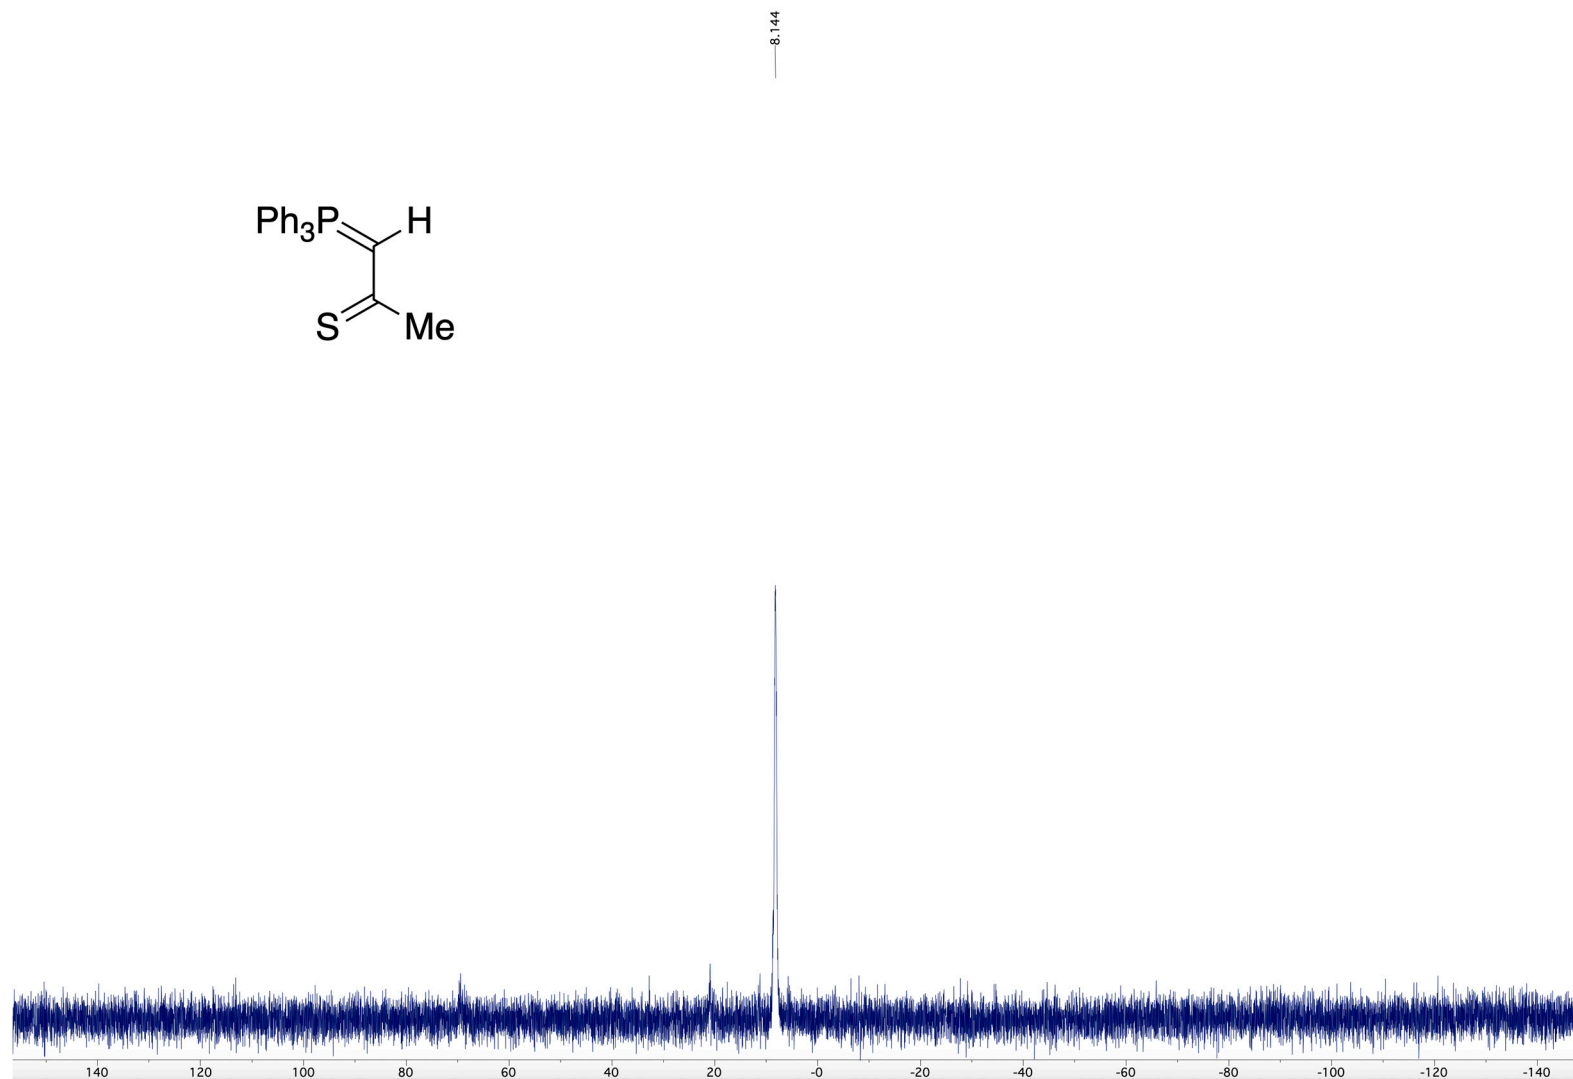

Figure S6: 75 MHz DEPTQ  $^{13}\text{C}$  NMR spectrum of **11** ( $\text{CDCl}_3$ )

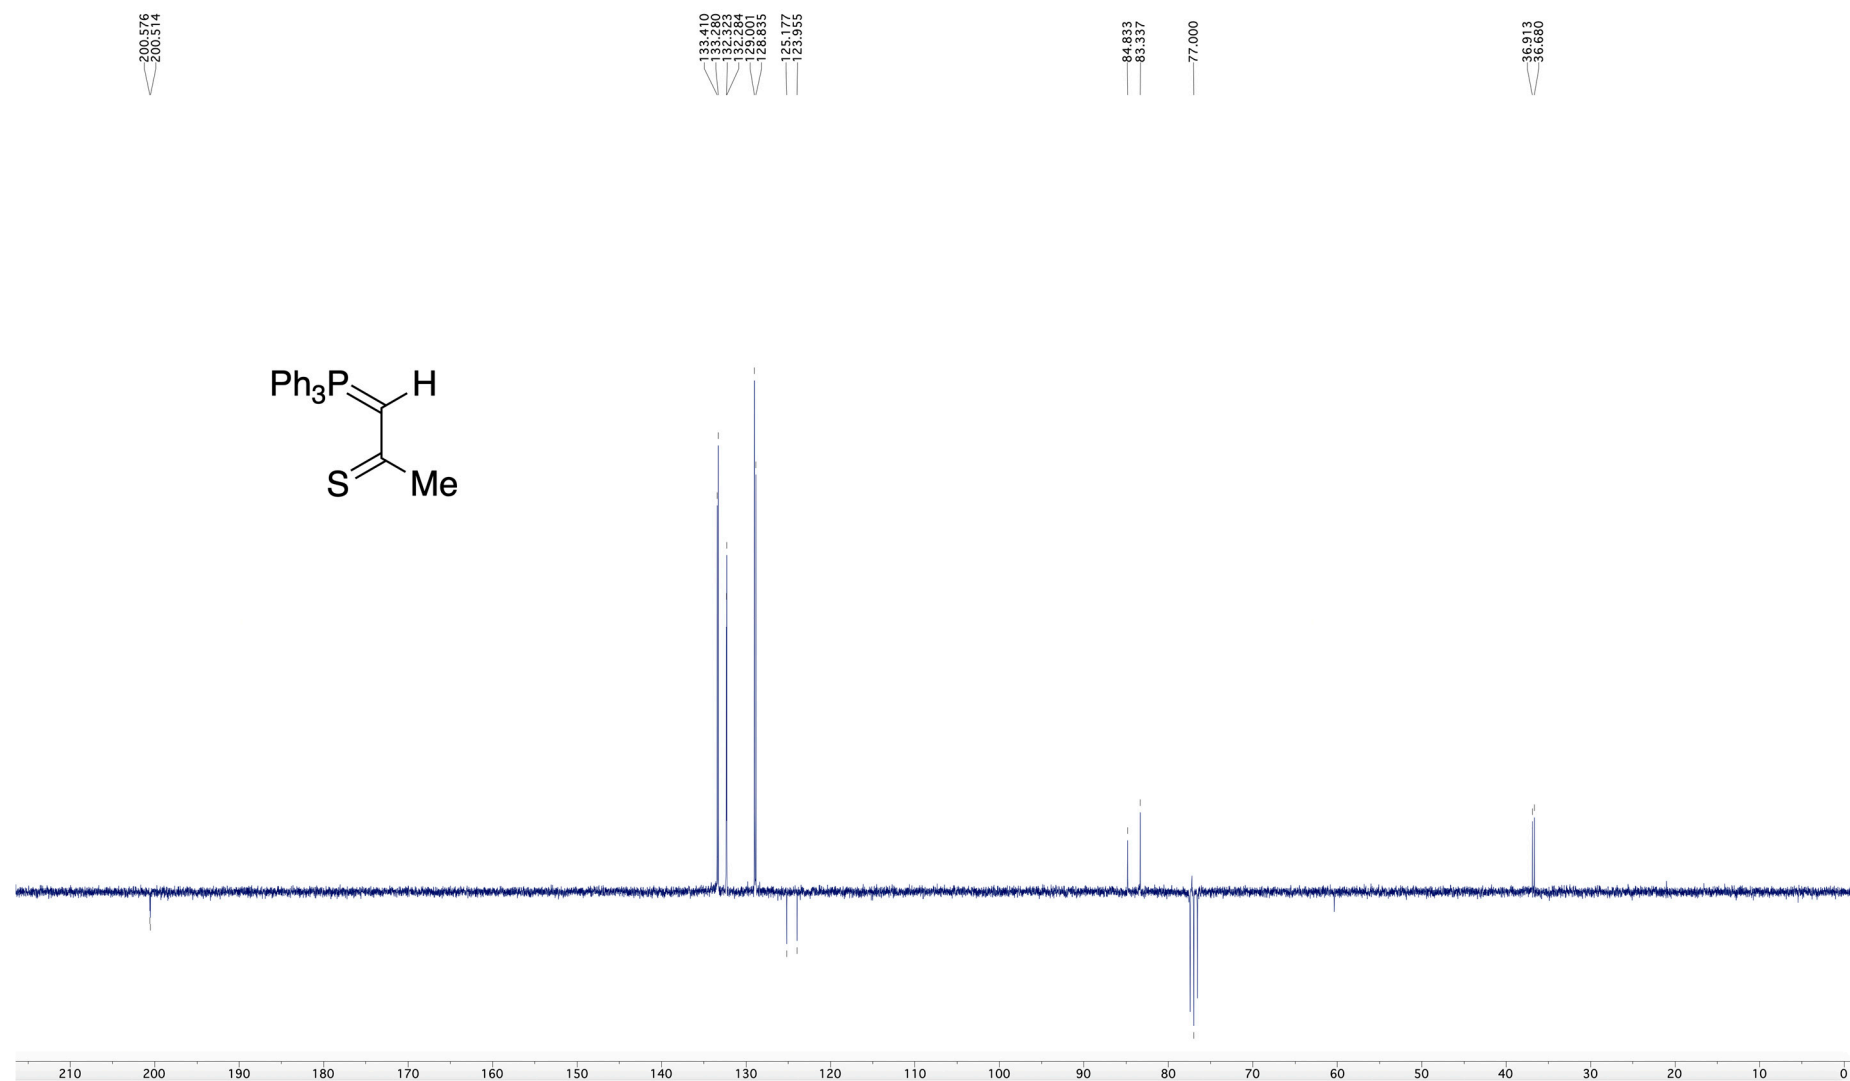

Figure S7: 300 MHz  $^1\text{H}$  NMR spectrum of **12** ( $\text{CDCl}_3$ )

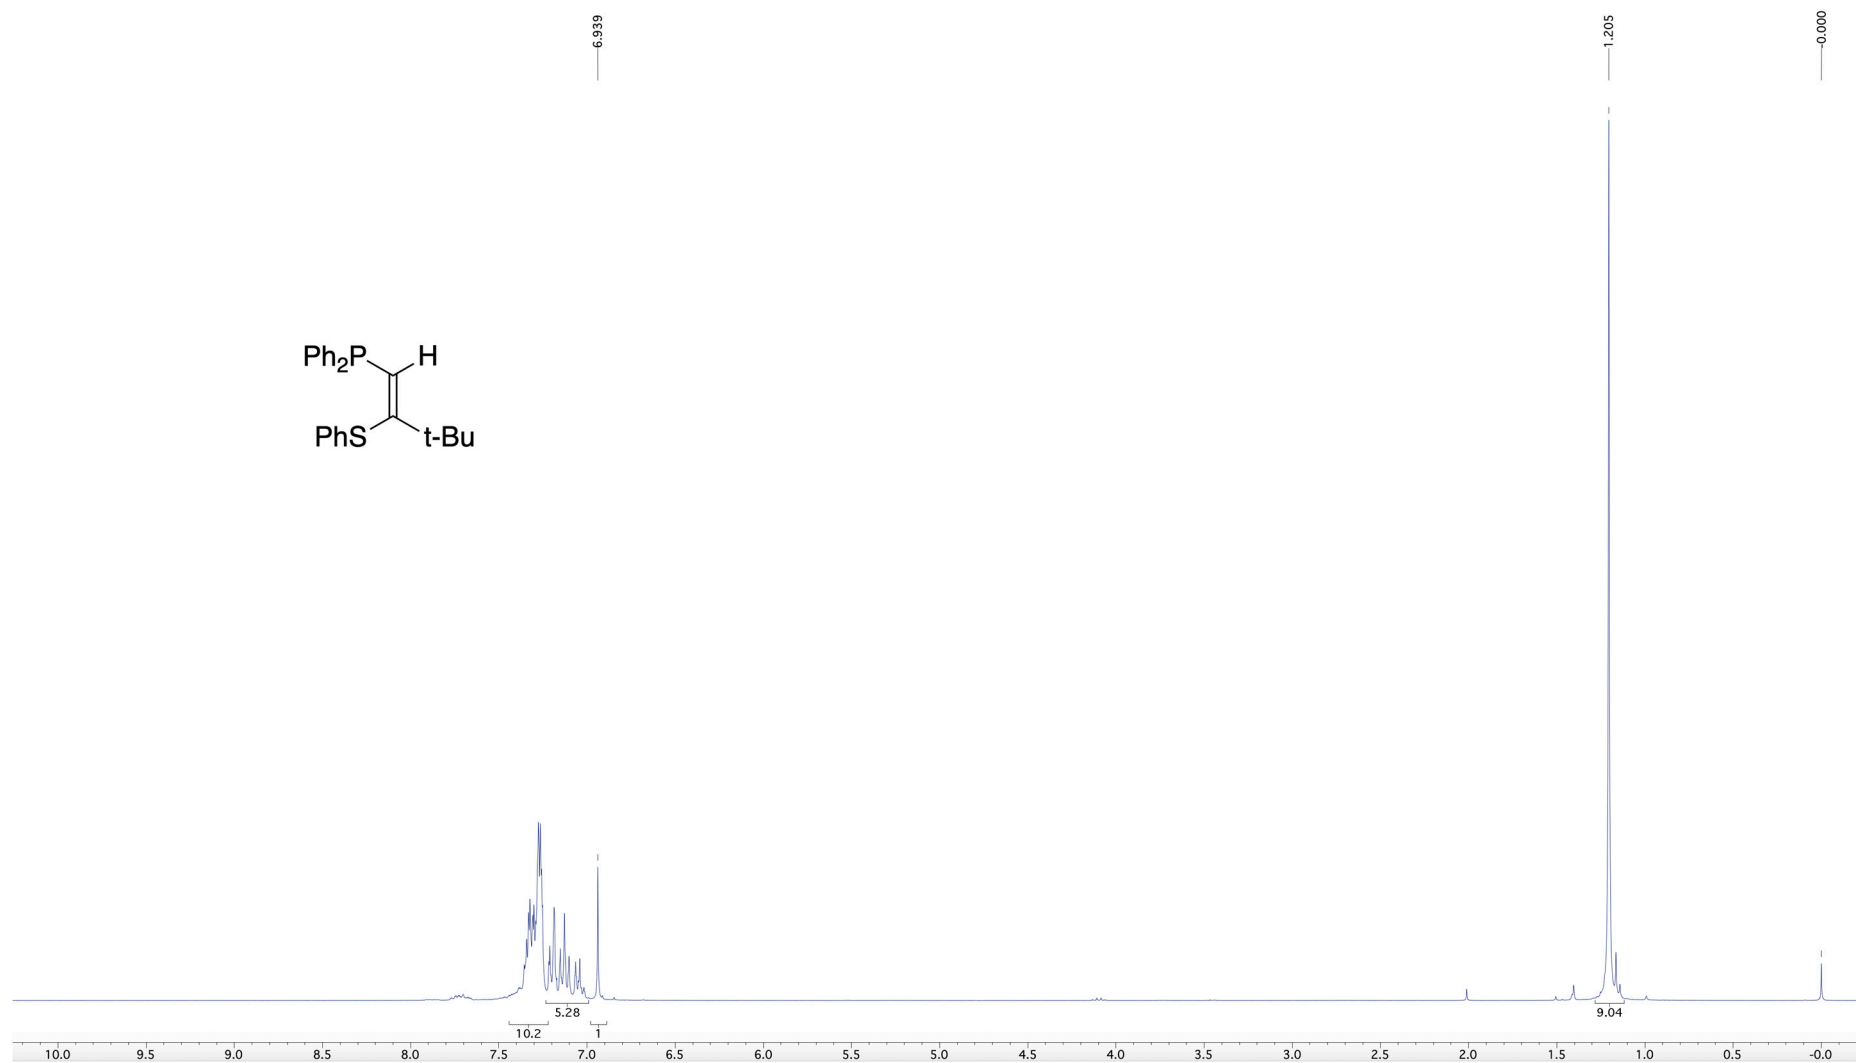



Figure S8: 121 MHz  $^{31}\text{P}$  NMR spectrum of **12** ( $\text{CDCl}_3$ )

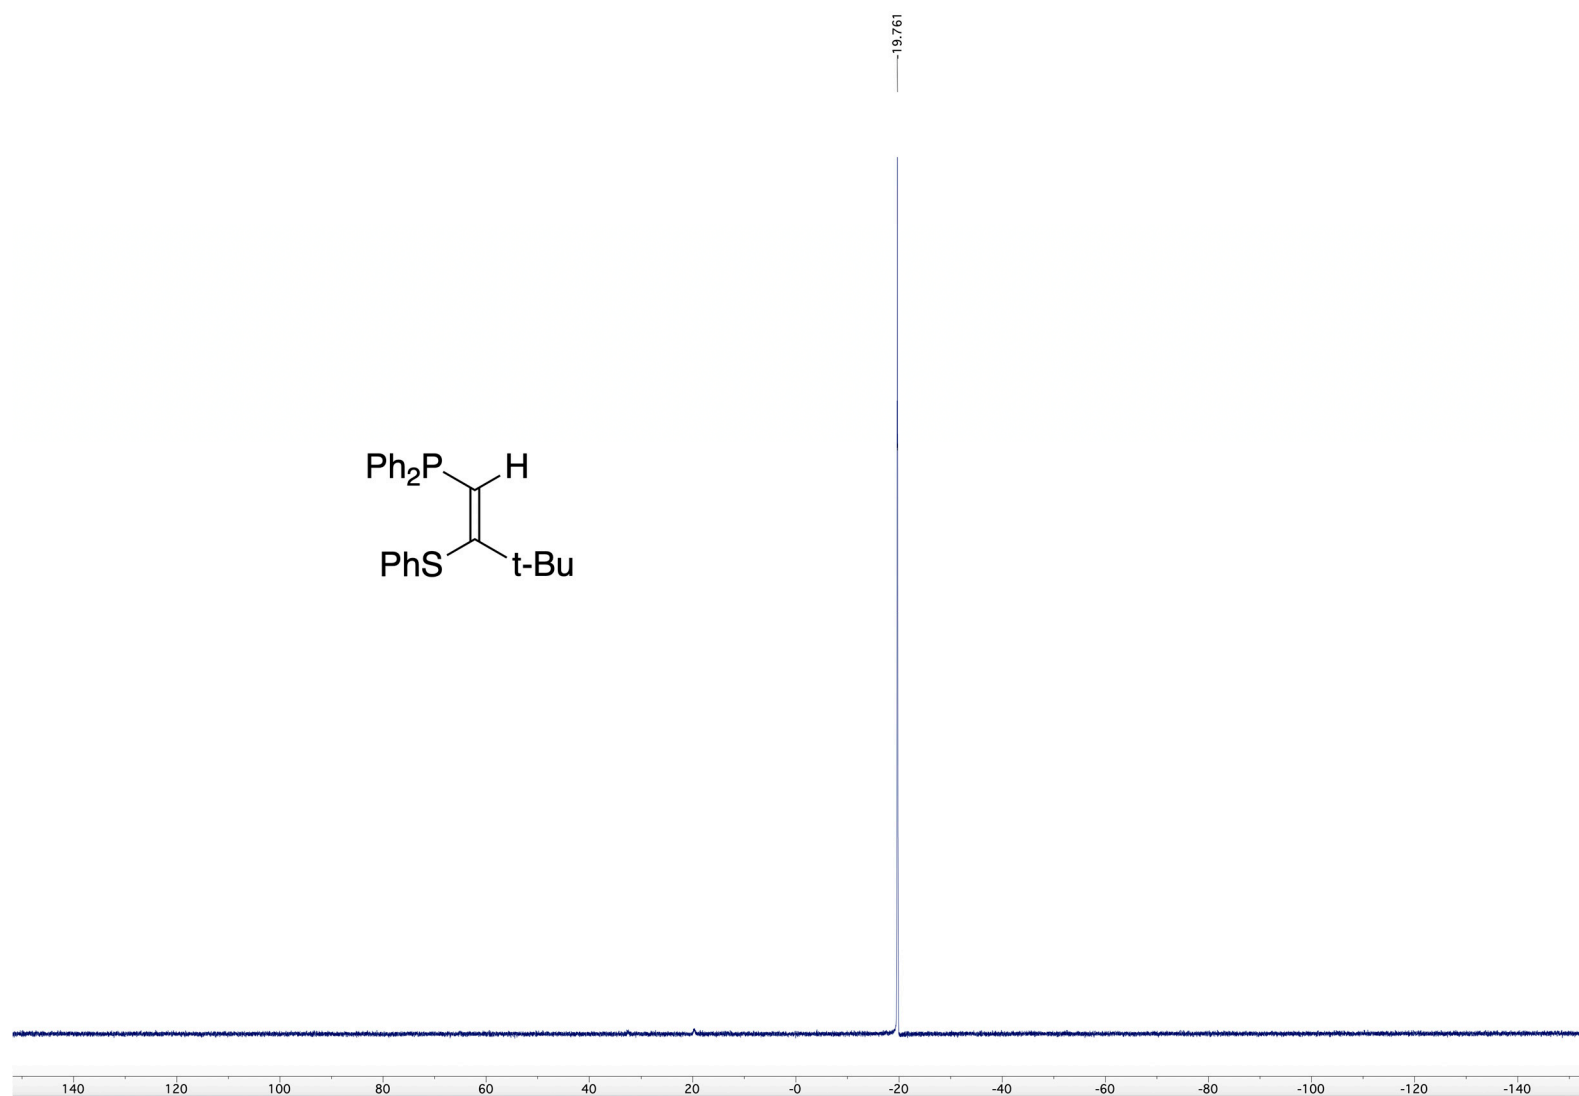

Chemical structure of the compound is shown:

CC(C)(C)/C=C/C1=CC=CC=C1S2=CC=CC=C2P3=CC=CC=C3

<sup>13</sup>C NMR spectrum (CDCl<sub>3</sub>) showing peaks at 158.6, 158.5, 139.2, 137.2, 136.9, 136.8, 136.7, 136.6, 136.5, 136.4, 136.3, 136.2, 136.1, 136.0, 135.9, 135.8, 135.7, 135.6, 135.5, 135.4, 135.3, 135.2, 135.1, 135.0, 134.9, 134.8, 134.7, 134.6, 134.5, 134.4, 134.3, 134.2, 134.1, 134.0, 133.9, 133.8, 133.7, 133.6, 133.5, 133.4, 133.3, 133.2, 133.1, 133.0, 132.9, 132.8, 132.7, 132.6, 132.5, 132.4, 132.3, 132.2, 132.1, 132.0, 131.9, 131.8, 131.7, 131.6, 131.5, 131.4, 131.3, 131.2, 131.1, 131.0, 130.9, 130.8, 130.7, 130.6, 130.5, 130.4, 130.3, 130.2, 130.1, 130.0, 129.9, 129.8, 129.7, 129.6, 129.5, 129.4, 129.3, 129.2, 129.1, 129.0, 128.9, 128.8, 128.7, 128.6, 128.5, 128.4, 128.3, 128.2, 128.1, 128.0, 127.9, 127.8, 127.7, 127.6, 127.5, 127.4, 127.3, 127.2, 127.1, 127.0, 126.9, 126.8, 126.7, 126.6, 126.5, 126.4, 126.3, 126.2, 126.1, 126.0, 125.9, 125.8, 125.7, 125.6, 125.5, 125.4, 125.3, 125.2, 125.1, 125.0, 124.9, 124.8, 124.7, 124.6, 124.5, 124.4, 124.3, 124.2, 124.1, 124.0, 123.9, 123.8, 123.7, 123.6, 123.5, 123.4, 123.3, 123.2, 123.1, 123.0, 122.9, 122.8, 122.7, 122.6, 122.5, 122.4, 122.3, 122.2, 122.1, 122.0, 121.9, 121.8, 121.7, 121.6, 121.5, 121.4, 121.3, 121.2, 121.1, 121.0, 120.9, 120.8, 120.7, 120.6, 120.5, 120.4, 120.3, 120.2, 120.1, 120.0, 119.9, 119.8, 119.7, 119.6, 119.5, 119.4, 119.3, 119.2, 119.1, 119.0, 118.9, 118.8, 118.7, 118.6, 118.5, 118.4, 118.3, 118.2, 118.1, 118.0, 117.9, 117.8, 117.7, 117.6, 117.5, 117.4, 117.3, 117.2, 117.1, 117.0, 116.9, 116.8, 116.7, 116.6, 116.5, 116.4, 116.3, 116.2, 116.1, 116.0, 115.9, 115.8, 115.7, 115.6, 115.5, 115.4, 115.3, 115.2, 115.1, 115.0, 114.9, 114.8, 114.7, 114.6, 114.5, 114.4, 114.3, 114.2, 114.1, 114.0, 113.9, 113.8, 113.7, 113.6, 113.5, 113.4, 113.3, 113.2, 113.1, 113.0, 112.9, 112.8, 112.7, 112.6, 112.5, 112.4, 112.3, 112.2, 112.1, 112.0, 111.9, 111.8, 111.7, 111.6, 111.5, 111.4, 111.3, 111.2, 111.1, 111.0, 110.9, 110.8, 110.7, 110.6, 110.5, 110.4, 110.3, 110.2, 110.1, 110.0, 109.9, 109.8, 109.7, 109.6, 109.5, 109.4, 109.3, 109.2, 109.1, 109.0, 108.9, 108.8, 108.7, 108.6, 108.5, 108.4, 108.3, 108.2, 108.1, 108.0, 107.9, 107.8, 107.7, 107.6, 107.5, 107.4, 107.3, 107.2, 107.1, 107.0, 106.9, 106.8, 106.7, 106.6, 106.5, 106.4, 106.3, 106.2, 106.1, 106.0, 105.9, 105.8, 105.7, 105.6, 105.5, 105.4, 105.3, 105.2, 105.1, 105.0, 104.9, 104.8, 104.7, 104.6, 104.5, 104.4, 104.3, 104.2, 104.1, 104.0, 103.9, 103.8, 103.7, 103.6, 103.5, 103.4, 103.3, 103.2, 103.1, 103.0, 102.9, 102.8, 102.7, 102.6, 102.5, 102.4, 102.3, 102.2, 102.1, 102.0, 101.9, 101.8, 101.7, 101.6, 101.5, 101.4, 101.3, 101.2, 101.1, 101.0, 100.9, 100.8, 100.7, 100.6, 100.5, 100.4, 100.3, 100.2, 100.1, 100.0, 99.9, 99.8, 99.7, 99.6, 99.5, 99.4, 99.3, 99.2, 99.1, 99.0, 98.9, 98.8, 98.7, 98.6, 98.5, 98.4, 98.3, 98.2, 98.1, 98.0, 97.9, 97.8, 97.7, 97.6, 97.5, 97.4, 97.3, 97.2, 97.1, 97.0, 96.9, 96.8, 96.7, 96.6, 96.5, 96.4, 96.3, 96.2, 96.1, 96.0, 95.9, 95.8, 95.7, 95.6, 95.5, 95.4, 95.3, 95.2, 95.1, 95.0, 94.9, 94.8, 94.7, 94.6, 94.5, 94.4, 94.3, 94.2, 94.1, 94.0, 93.9, 93.8, 93.7, 93.6, 93.5, 93.4, 93.3, 93.2, 93.1, 93.0, 92.9, 92.8, 92.7, 92.6, 92.5, 92.4, 92.3, 92.2, 92.1, 92.0, 91.9, 91.8, 91.7, 91.6, 91.5, 91.4, 91.3, 91.2, 91.1, 91.0, 90.9, 90.8, 90.7, 90.6, 90.5, 90.4, 90.3, 90.2, 90.1, 90.0, 89.9, 89.8, 89.7, 89.6, 89.5, 89.4, 89.3, 89.2, 89.1, 89.0, 88.9, 88.8, 88.7, 88.6, 88.5, 88.4, 88.3, 88.2, 88.1, 88.0, 87.9, 87.8, 87.7, 87.6, 87.5, 87.4, 87.3, 87.2, 87.1, 87.0, 86.9, 86.8, 86.7, 86.6, 86.5, 86.4, 86.3, 86.2, 86.1, 86.0, 85.9, 85.8, 85.7, 85.6, 85.5, 85.4, 85.3, 85.2, 85.1, 85.0, 84.9, 84.8, 84.7, 84.6, 84.5, 84.4, 84.3, 84.2, 84.1, 84.0, 83.9, 83.8, 83.7, 83.6, 83.5, 83.4, 83.3, 83.2, 83.1, 83.0, 82.9, 82.8, 82.7, 82.6, 82.5, 82.4, 82.3, 82.2, 82.1, 82.0, 81.9, 81.8, 81.7, 81.6, 81.5, 81.4, 81.3, 81.2, 81.1, 81.0, 80.9, 80.8, 80.7, 80.6, 80.5, 80.4, 80.3, 80.2, 80.1, 80.0, 79.9, 79.8, 79.7, 79.6, 79.5, 79.4, 79.3, 79.2, 79.1, 79.0, 78.9, 78.8, 78.7, 78.6, 78.5, 78.4, 78.3, 78.2, 78.1, 78.0, 77.9, 77.8, 77.7, 77.6, 77.5, 77.4, 77.3, 77.2, 77.1, 77.0, 76.9, 76.8, 76.7, 76.6,

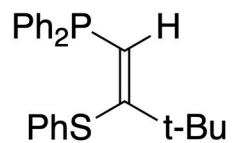

Figure S10: 300 MHz  $^1\text{H}$  NMR spectrum of **13/14** (Z/E 6.5:1) ( $\text{CDCl}_3$ )

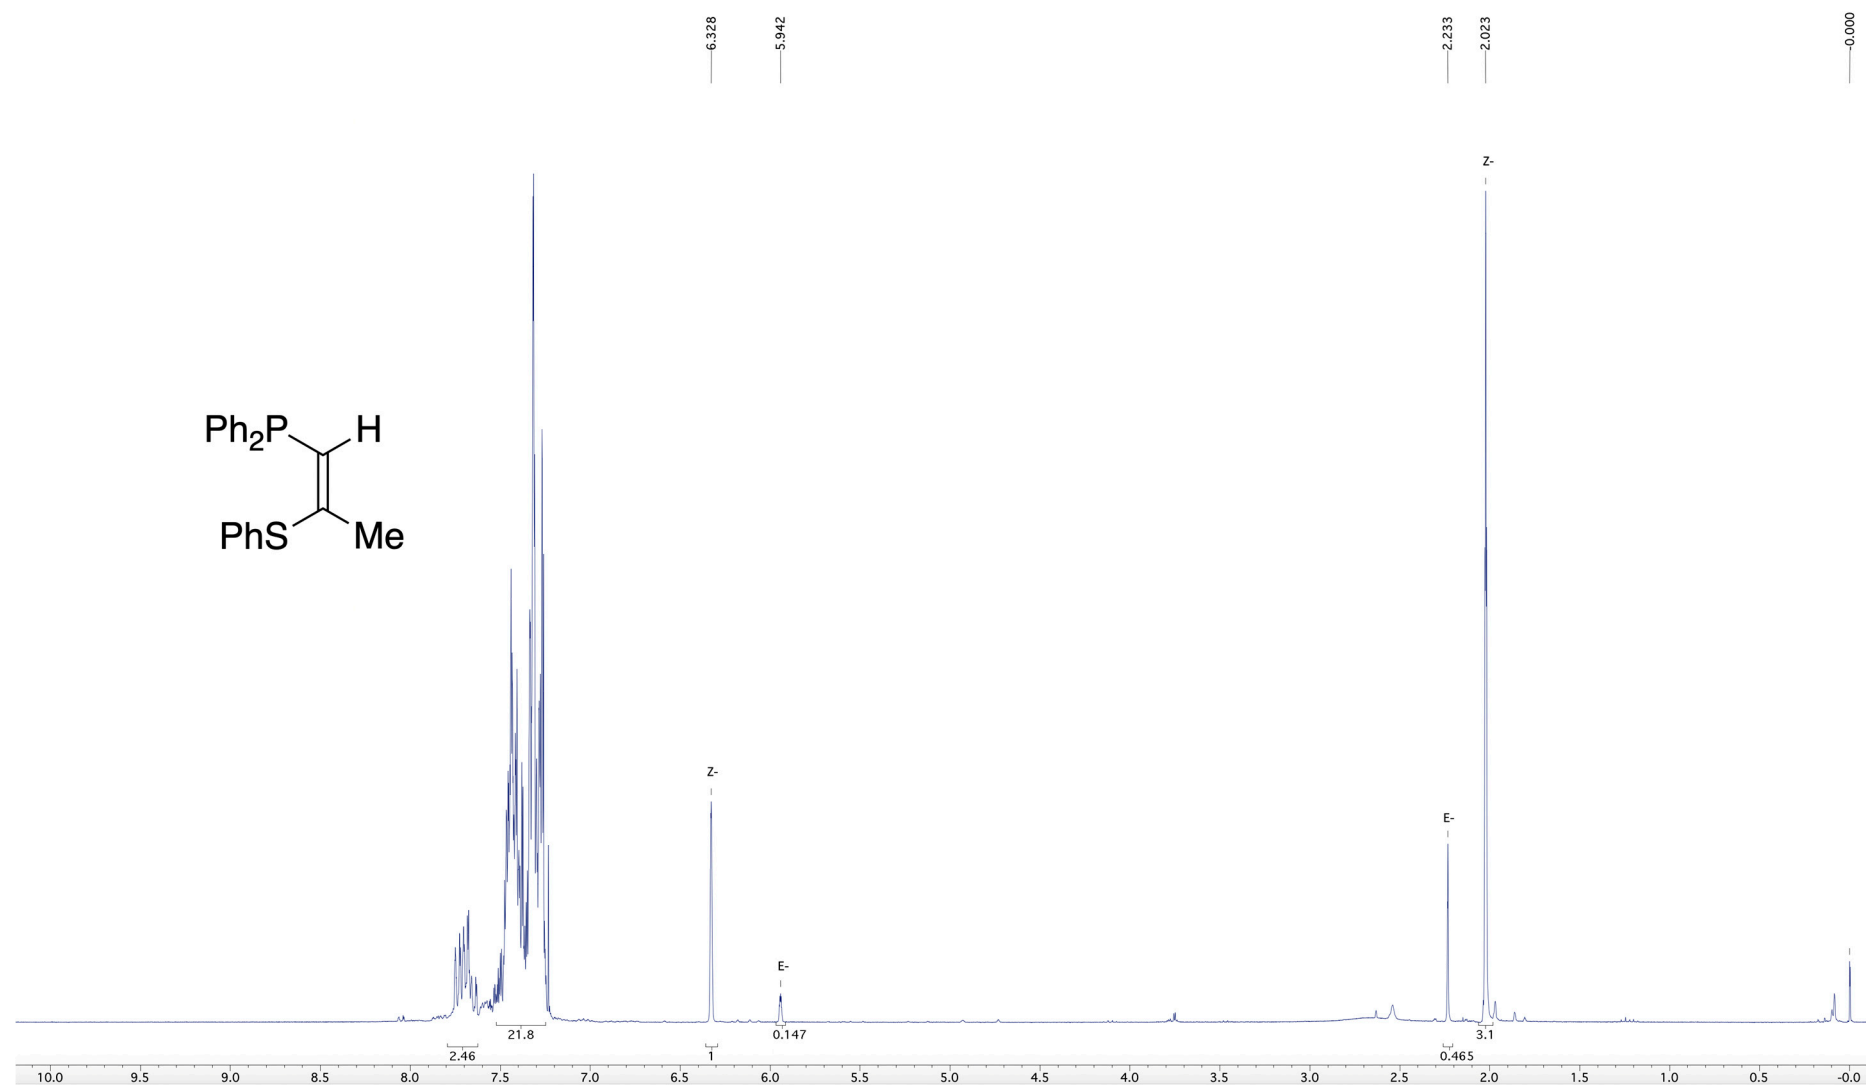

Figure S11: 121 MHz  $^{31}\text{P}$  NMR spectrum of **13/14** (*Z/E* 6.5:1) ( $\text{CDCl}_3$ )

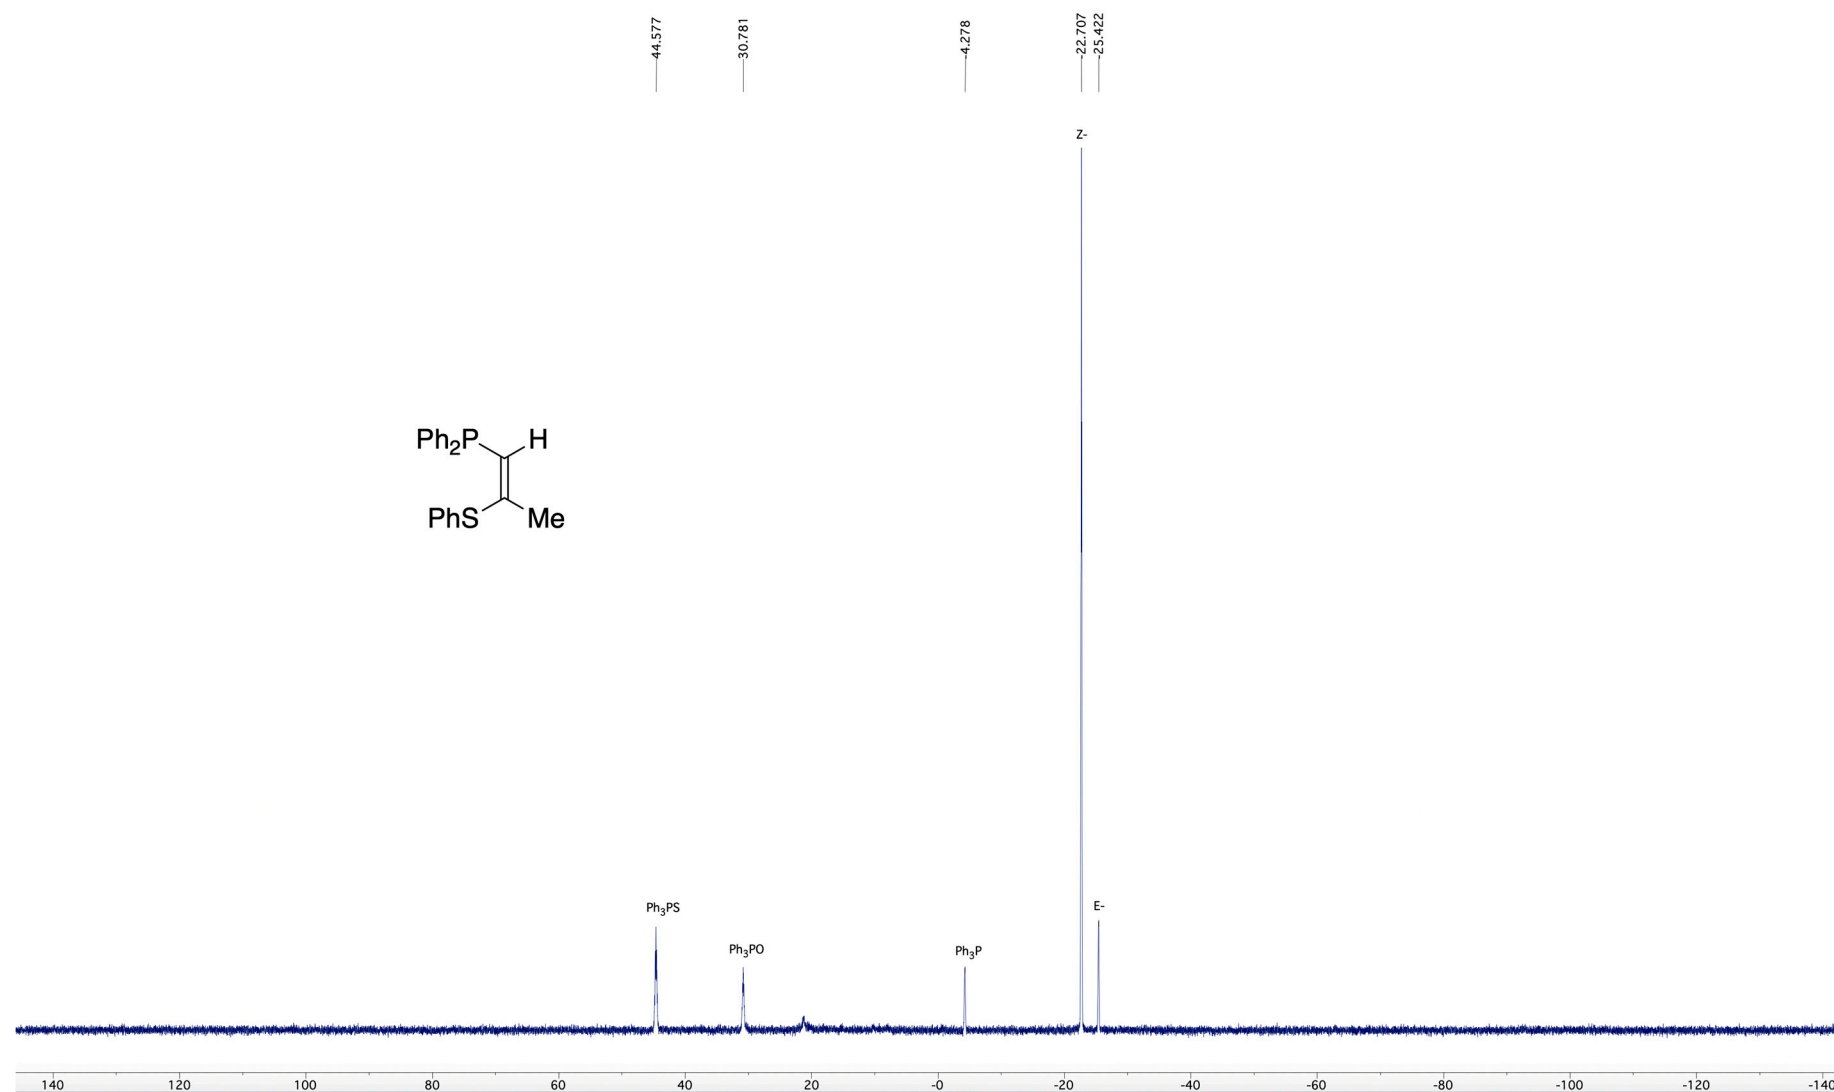

Figure S12: 75 MHz  $^{13}\text{C}$  NMR spectrum of **13/14** (Z/E 6.5:1) ( $\text{CDCl}_3$ )

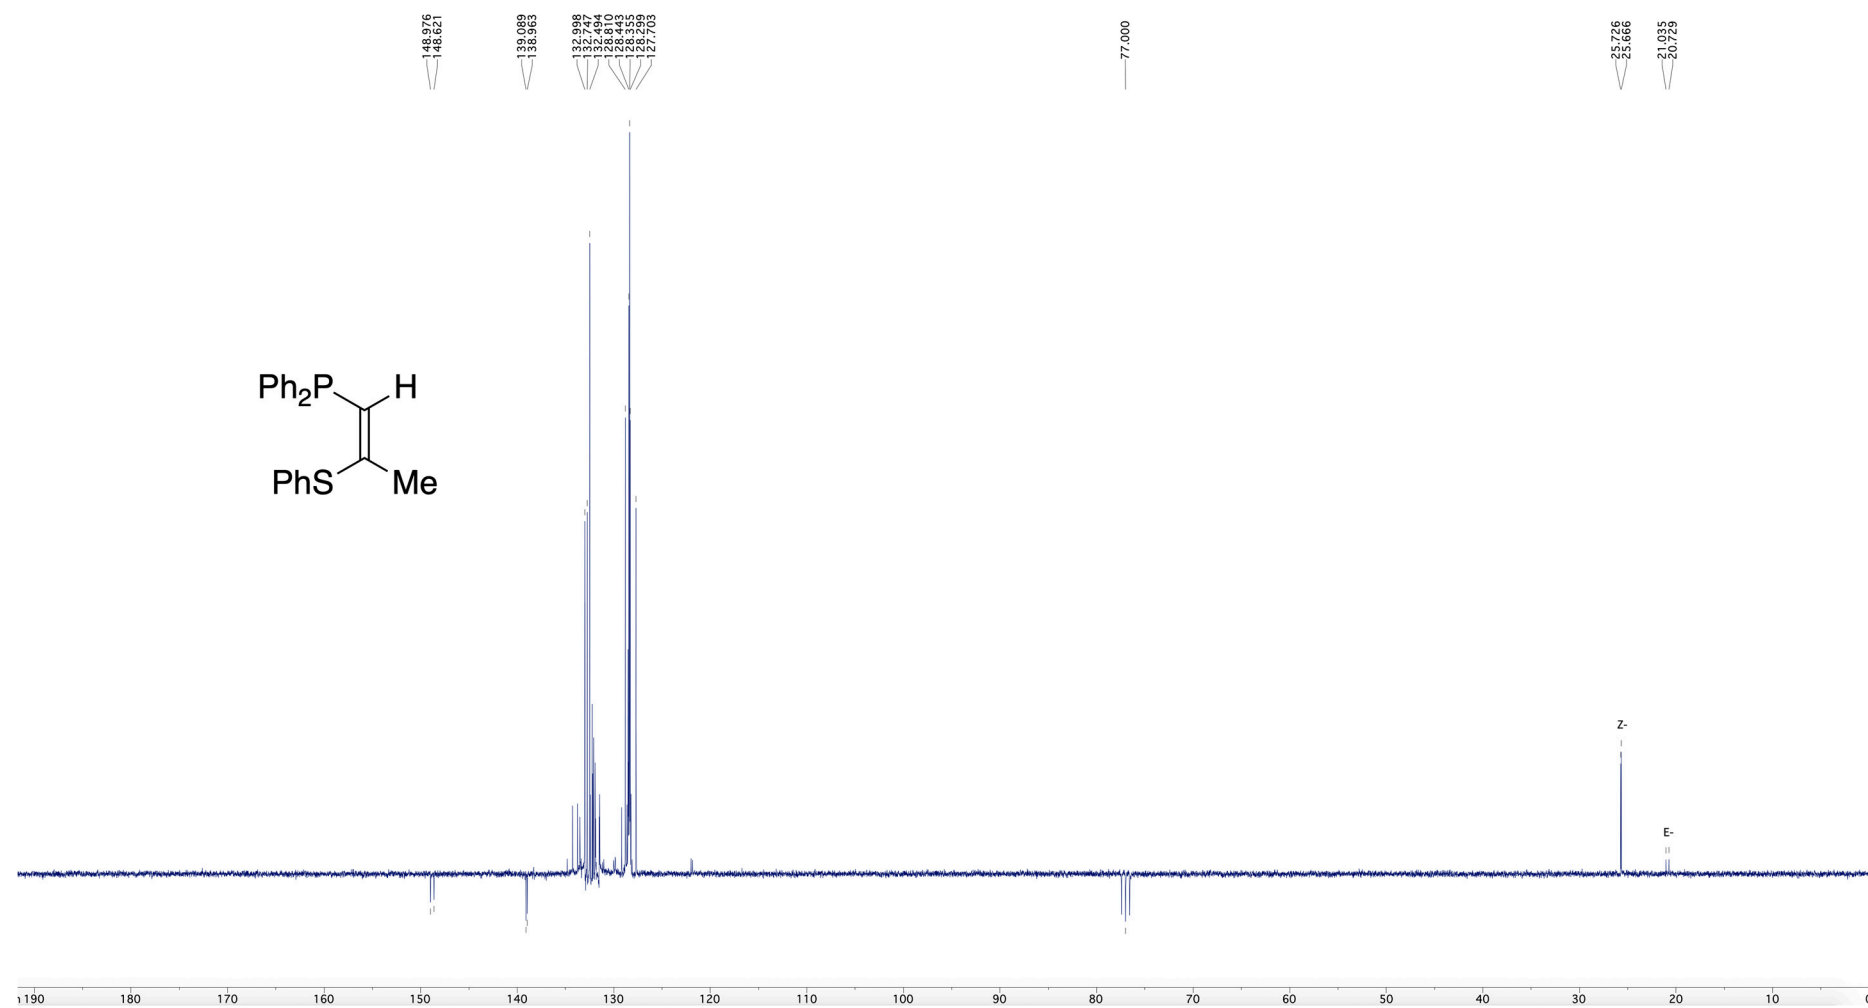

1H NMR spectrum of (E)-2,3-dichlorobut-2-ene in CDCl<sub>3</sub>. The spectrum shows a multiplet for the alkene protons between 6.5 and 7.5 ppm, with peaks labeled 'Z-' and 'E-'. A large solvent peak for CDCl<sub>3</sub> is at 7.26 ppm. A sharp singlet for the geminal chlorine protons is at 2.23 ppm, with a peak labeled 'F-'. A small peak for the methyl protons is at 1.93 ppm, labeled 'Z-'. The x-axis ranges from 10.0 to -0.0 ppm.

Figure S14: 300 MHz  $^1\text{H}$  NMR spectrum of **13/14** (Z/E 1:1) ( $\text{CDCl}_3$ ) Expansions

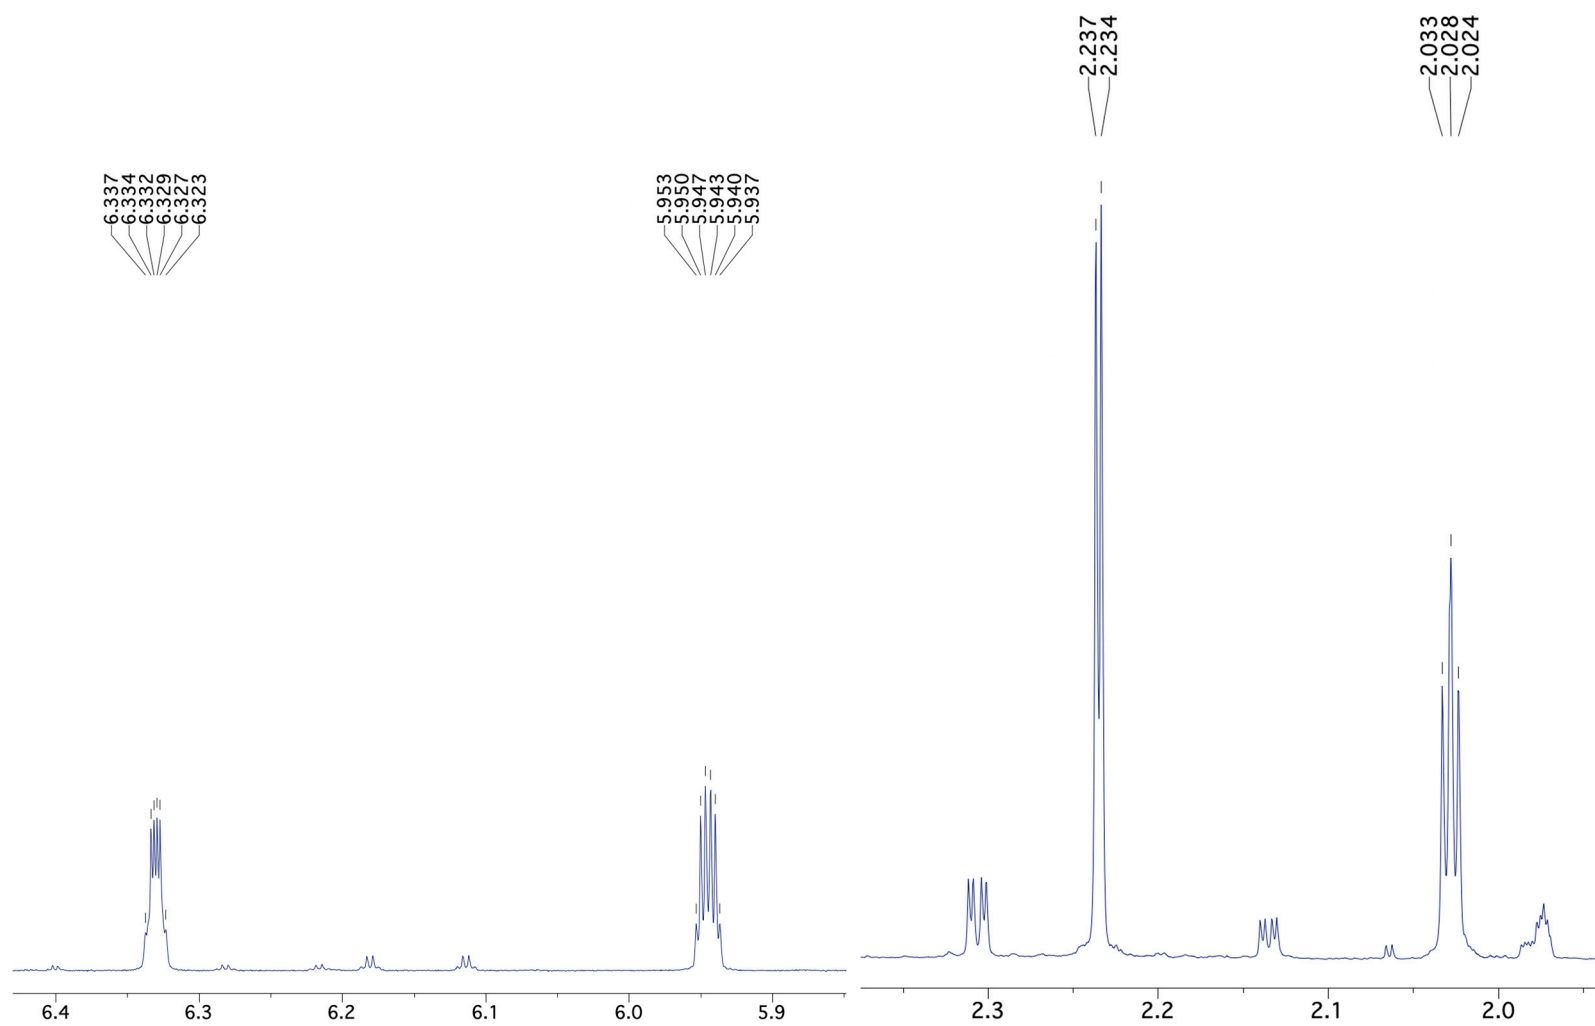

Figure S15: 121 MHz  $^{31}\text{P}$  NMR spectrum of **13/14** (*Z/E* 1:1) ( $\text{CDCl}_3$ )

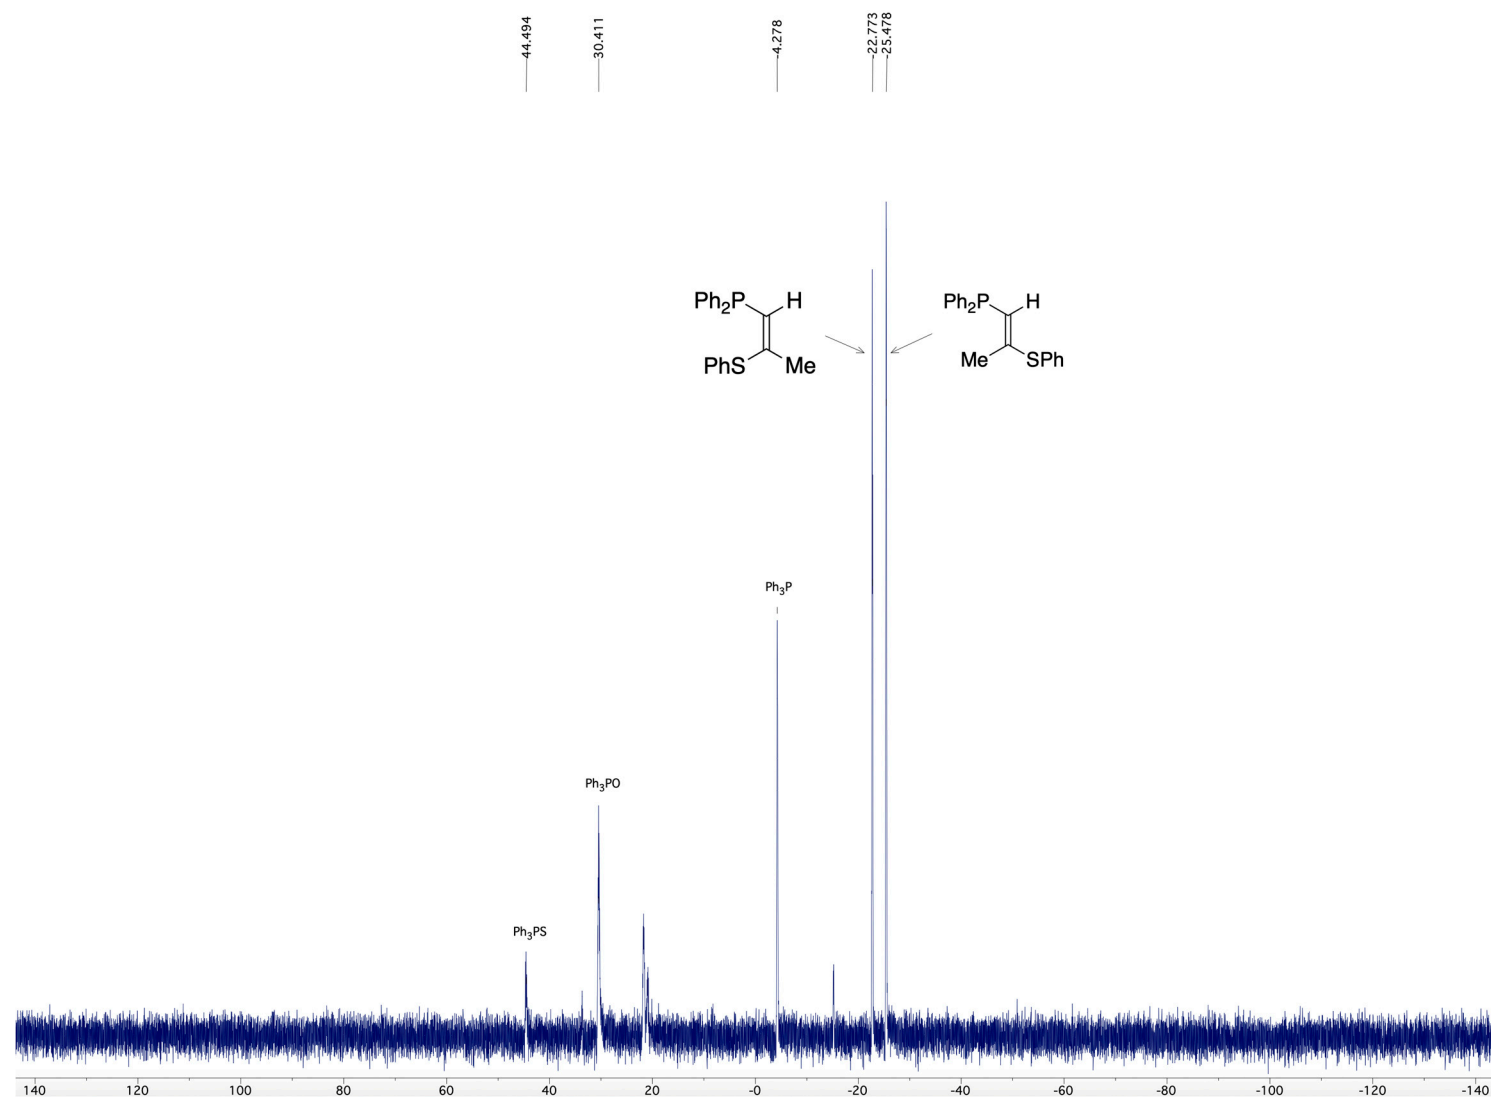



Figure S16: 75 MHz  $^{13}\text{C}$  NMR spectrum of **13/14** (Z/E 1:1) ( $\text{CDCl}_3$ )

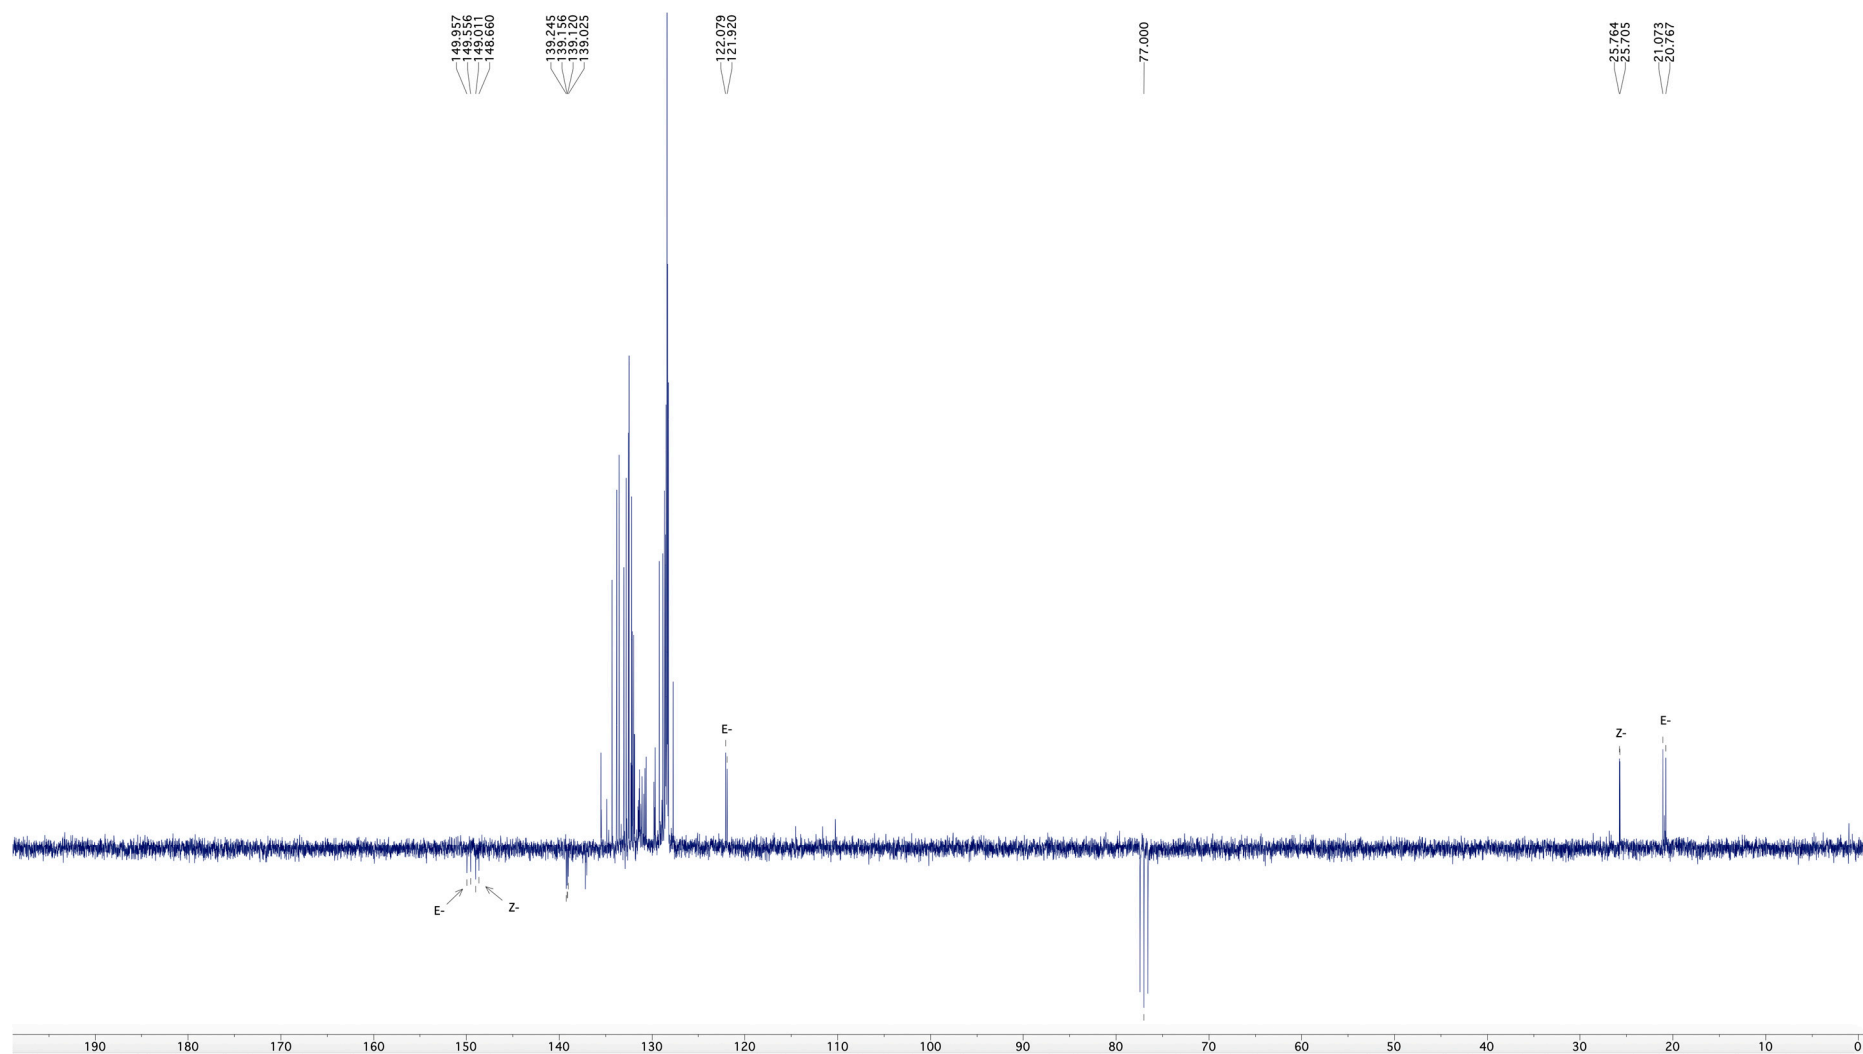

Supplement: s1 [file s1]
